# Supplementary material
Source: PubMed Central journal article supplement (PMC6260592)
Supplement: NIHMS981458-supplement-Table_S1.pdf [file NIHMS981458-supplement-Table_S1.pdf]

**Supplementary Table 1. Searches on PubMed using keyword(s) and *DICER1***

| <b>Search keywords</b>                                                  | <b>Returns<br/>as of<br/>05/31/17</b> |
|-------------------------------------------------------------------------|---------------------------------------|
| pleuropulmonary blastoma                                                | 68                                    |
| Sertoli-Leydig cell tumor                                               | 50                                    |
| gynandroblastoma                                                        | 23                                    |
| juvenile hamartomatous polyp                                            | 1                                     |
| cystic nephroma                                                         | 30                                    |
| multinodular goiter                                                     | 18                                    |
| thyroid adenoma                                                         | 13                                    |
| thyroid carcinoma                                                       | 16                                    |
| ciliary body medulloepithelioma                                         | 8                                     |
| botryoid embryonal rhabdomyosarcoma (ERMS) of the cervix or other sites | 1                                     |
| nasal chondromesenchymal hamartoma                                      | 6                                     |
| renal sarcoma                                                           | 7                                     |
| pituitary blastoma                                                      | 2                                     |
| pineoblastoma                                                           | 5                                     |
